# Supplementary material for: Poly(vinyl alcohol)/modified porous starch gel beads for microbial preservation and reactivation: preparation, characterization and its wastewater treatment performance
Source: Royal Society of Chemistry journal article supplement (doi:10.1039/d3ra05371g), 2023-01-01
Supplement: d3ra05371g1.pdf [file d3ra05371g1.pdf]

## Supplementary materials

### **Poly (vinyl alcohol)/modified porous starch gel beads for microbial preservation and reactivation: Preparation, characterization and its wastewater treatment performance**

Shutao Lin<sup>a,b</sup>, Ruiting Chang<sup>b</sup>, Xingyu Cao<sup>b</sup>, Yongheng Zhang<sup>b</sup>, Jiabo Chen,  
Wenchao Jiang<sup>b\*</sup>, Zhi Zhang<sup>a,b\*</sup>

<sup>a</sup>Key Laboratory of Three Gorges Reservoir Region's Eco-Environment, Ministry of Education, Chongqing University, Chongqing 400045, China

<sup>b</sup>College of Environment and Ecology, Chongqing University, Chongqing 400045, China

\*Corresponding author at: Key Laboratory of Three Gorges Reservoir Region's Eco-Environment, Ministry of Education, Chongqing University, Chongqing 400045, China.

E-mail address: zhangzhicqu@cqu.edu.cn (Z. Zhang)<sup>1</sup>

E-mail address: wchjiang@qq.com (J. Jiang)<sup>2</sup>

---

\* Corresponding author at: Key Laboratory of Three Gorges Reservoir Region's Eco-Environment, Ministry of Education, Chongqing University, Chongqing 400045, China.  
E-mail address: zhangzhicqu@cqu.edu.cn (Z. Zhang).  
E-mail address: wchjiang @qq.com (J. Jiang).

## **Captions**

**Text S1** Microorganisms and cultivation

**Text S2** Shock loading test of influent ammonia nitrogen concentration

**Table S1** The components of trace element

**Table S2** Pore structure parameters of PVA-PS and PVA-MPS gel beads.

**Fig. S1** Cycle time distribution of reactor

**Fig. S2** SEM image of (a) PS and (b) MPS

**Fig. S3** Adsorption and desorption isotherms for PVA-PS and PVA-MPS gel beads

**Fig. S4** Performance of microbial gel beads against ammonia shock loading

**Fig. S5** Digital image of PVA-MPS gel beads before preservation

**Fig. S6** Digital image of PVA-MPS gel beads after reactivation

### **Text S1** Microorganisms and cultivation

The inoculum sludge was obtained from the JiGuanShi Municipal Wastewater Plant of Chongqing (China), and its properties were as follows: mixed liquor suspended solid concentration (MLSS)  $4000 \pm 150$  mg/L, the ratio of mixed liquor suspended solid concentration to mixed liquid volatile suspended solids (MLSS/MLVSS) 0.72. The algae (*Chlorella*, FACHB-1068,  $1.24 \times 10^7$  Cell/mL) was obtained from the Freshwater Algae Culture Collection at the Institute of Hydrobiology (China).

### **Text S2** Shock loading experiment of influent ammonia nitrogen concentration

The experiments were set up with influent ammonia nitrogen concentrations of 35 mg/L, 50 mg/L and 70 mg/L, and the influent ammonia nitrogen concentration was changed every 5 cycles, while the rest of the influent and experimental conditions remained the same as in the manuscript.

As shown in Figure S4, when the initial ammonia nitrogen concentration was 35mg/l, the ammonia nitrogen removal effect of PVA-MPS gel beads was gradually enhanced with the increase in the number of reaction cycles, and the ammonia nitrogen removal rate rapidly reached more than 95%. In the 6th cycle, the ammonia nitrogen concentration of the feed water was increased to 50mg/l, and the ammonia nitrogen removal effect of PVA-MPS gel beads was reduced under the impact load of this ammonia nitrogen concentration, but the ammonia nitrogen removal rate was basically maintained at more than 85%. And in the influent ammonia nitrogen concentration shock load increased to 70 mg/l, the ammonia nitrogen removal rate of

PVA-MPS gel beads decreased significantly, and the final ammonia nitrogen removal rate was 38%. The ammonia nitrogen removal of PVA-PS gel beads had a similar trend with PVA-MPS gel beads, but the ammonia nitrogen removal rate was always lower than that of PVA-MPS gel beads, and the final ammonia nitrogen removal rate was only 27%. In addition, at the end of the reaction, the morphology and elasticity of the PVA-MPS gel beads remained good, while partial breakage and microbial leakage occurred in the PVA-PS gel beads.

**Table S1** The components of trace element.

| Component                             | Concentration |
|---------------------------------------|---------------|
| EDTA-NA <sub>2</sub>                  | 23.01 g/L     |
| FeSO <sub>4</sub> ·7H <sub>2</sub> O  | 5.00 g/L      |
| ZnSO <sub>4</sub> ·7H <sub>2</sub> O  | 0.43 g/L      |
| H <sub>3</sub> BO <sub>4</sub>        | 0.014 g/L     |
| CoCl <sub>2</sub> ·6H <sub>2</sub> O  | 0.24 g/L      |
| MnCl·4H <sub>2</sub> O                | 0.99 g/L      |
| CuSO <sub>4</sub> ·5H <sub>2</sub> O  | 0.25 g/L      |
| NaMoO <sub>4</sub> ·4H <sub>2</sub> O | 0.22 g/L      |
| NiCl <sub>2</sub> ·6H <sub>2</sub> O  | 0.19 g/L      |
| NaSeO <sub>4</sub>                    | 0.11 g/L      |

**Table S2** Pore structure parameters of PVA-PS and PVA-MPS gel beads.

| Samples | S <sub>BET</sub> <sup>a</sup><br>(m <sup>2</sup> /g) | V <sub>total</sub> <sup>b</sup><br>(cm <sup>3</sup> /g) | Average pore size<br>(nm) |
|---------|------------------------------------------------------|---------------------------------------------------------|---------------------------|
| PVA-PS  | 4.424                                                | 0.021                                                   | 11.790                    |
| PVA-MPS | 5.413                                                | 0.040                                                   | 12.387                    |

<sup>a</sup> specific surface area; and <sup>b</sup> surface area of the micropores of the gel beads.

| Cycle | Time (min)    | 5 | 355 | 300 | 55 | 3 | 2 |
|-------|---------------|---|-----|-----|----|---|---|
| 1-50  | Influent      | █ |     |     |    |   |   |
|       | Aeration      |   | █   | █   | █  |   |   |
|       | Sedimentation |   |     |     |    | █ |   |
|       | Discharge     |   |     |     |    |   | █ |
| 51-60 | Influent      | █ |     |     |    |   |   |
|       | Aeration      |   | █   |     | █  |   |   |
|       | Anaerobic     |   |     | █   |    |   |   |
|       | Sedimentation |   |     |     |    | █ |   |
|       | Discharge     |   |     |     |    |   | █ |

**Fig. S1** Cycle time distribution of reactor

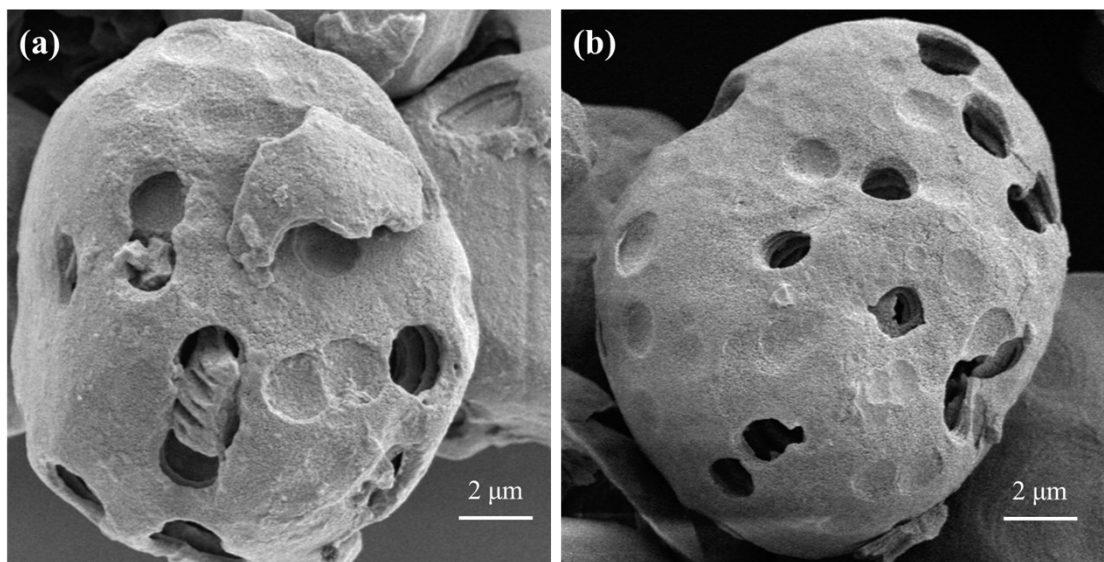

**Fig. S2** SEM image of (a) PS and (b) MPS

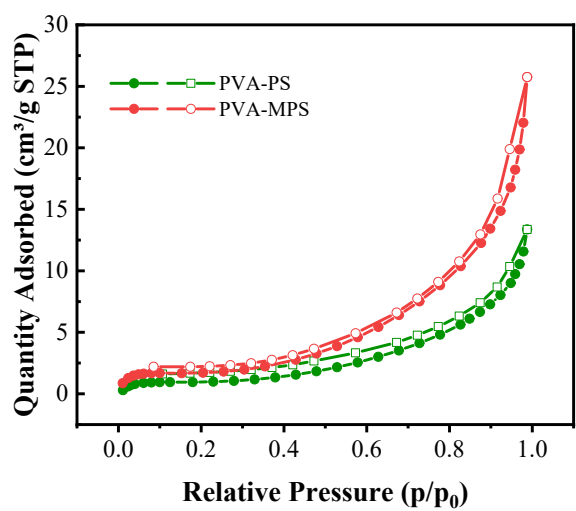

**Fig. S3** Adsorption and desorption isotherms for PVA-PS and PVA-MPS gel beads

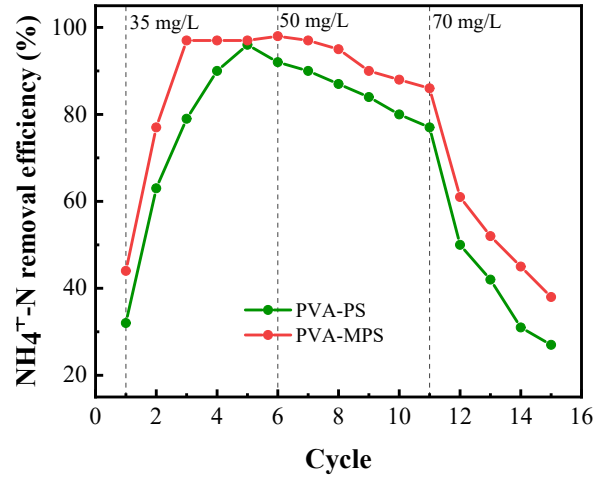

**Fig. S4** Performance of microbial gel beads against ammonia shock loading

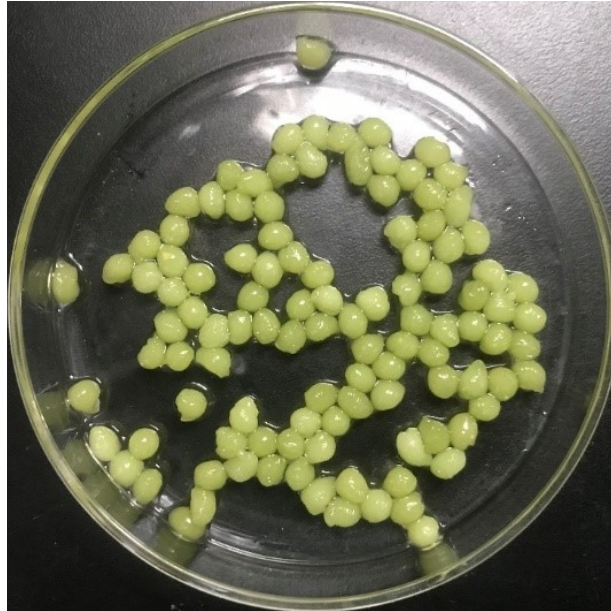

**Fig. S5** Digital image of PVA-MPS gel beads before preservation

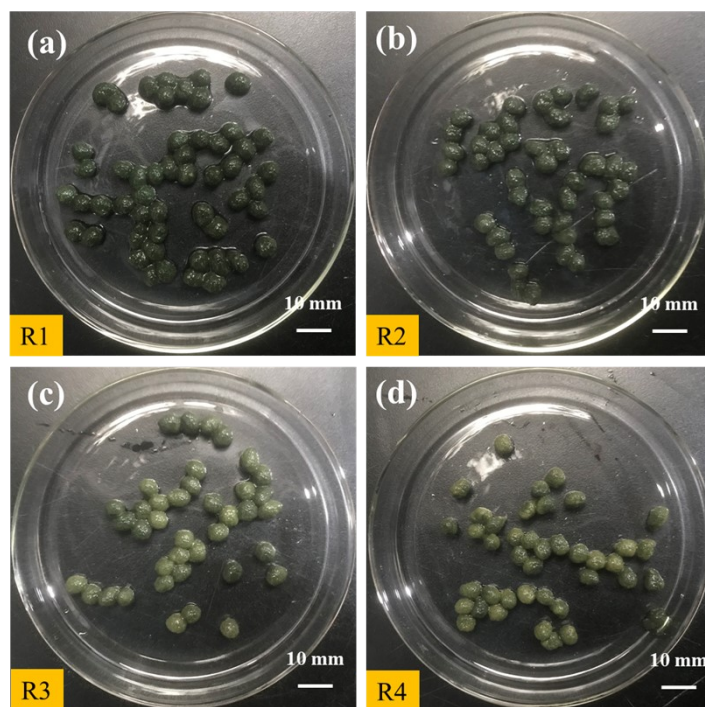

**Fig. S6** Digital image of PVA-MPS gel beads collected from (a) R1, (b) R2, (c) R3, and (d) R4 were reactivated in separate reactors.
